# Supplementary material for: Long Distance Dispersal and Connectivity in Amphi-Atlantic Corals at Regional and Basin Scales
Source: PubMed Central journal article supplement (PMC3142122; doi:10.1371/journal.pone.0022298), 2011-07-22
Supplement: pone.0022298.s001.pdf [file pone.0022298.s001.pdf]

| Species               |                         | Caribbean | Brazil | W. Africa |
|-----------------------|-------------------------|-----------|--------|-----------|
| <i>Acropora</i>       | <i>cervicornis</i>      | X         |        |           |
| <i>Acropora</i>       | <i>palmata</i>          | X         |        |           |
| <i>Agaricia</i>       | <i>fragilis</i>         | X         | X      |           |
| <i>Agaricia</i>       | <i>undata</i>           | X         |        |           |
| <i>Agaricia</i>       | <i>agaricites</i>       | X         | X      |           |
| <i>Agaricia</i>       | <i>grahamae</i>         | X         |        |           |
| <i>Agaricia</i>       | <i>humilis</i>          | X         |        |           |
| <i>Agaricia</i>       | <i>tenuifolia</i>       | X         |        |           |
| <i>Agaricia</i>       | <i>lamarcki</i>         | X         |        |           |
| <i>Cladocora</i>      | <i>arbuscula</i>        | X         |        |           |
| <i>Cladocora</i>      | <i>debilis</i>          | X         |        |           |
| <i>Colpophyllia</i>   | <i>natans</i>           | X         |        |           |
| <i>Dendrogyra</i>     | <i>cylindrus</i>        | X         |        |           |
| <i>Dichocoenia</i>    | <i>stellaris</i>        | X         |        |           |
| <i>Dichocoenia</i>    | <i>stokesii</i>         | X         |        |           |
| <i>Diploria</i>       | <i>clivosa</i>          | X         |        |           |
| <i>Diploria</i>       | <i>labyrinthiformis</i> | X         |        |           |
| <i>Diploria</i>       | <i>strigosa</i>         | X         |        |           |
| <i>Eusmilia</i>       | <i>fastigiata</i>       | X         |        |           |
| <i>Favia</i>          | <i>leptophylla</i>      |           | X      |           |
| <i>Favia</i>          | <i>fragum</i>           | X         |        | X         |
| <i>Favia</i>          | <i>gravida</i>          |           | X      | X         |
| <i>Helioseris</i>     | <i>cucullata</i>        | X         |        |           |
| <i>Isophyllastrea</i> | <i>rigida</i>           | X         |        |           |
| <i>Isophyllia</i>     | <i>sinuosa</i>          | X         |        |           |
| <i>Leptoseris</i>     | <i>cailleti</i>         | X         |        |           |
| <i>Madracis</i>       | <i>asperula</i>         | X         | X      | X         |
| <i>Madracis</i>       | <i>brueggemanni</i>     | X         | X      |           |
| <i>Madracis</i>       | <i>carmabi</i>          | X         |        |           |
| <i>Madracis</i>       | <i>auretenra</i>        | X         |        |           |
| <i>Madracis</i>       | <i>decactis</i>         | X         | X      | X         |
| <i>Madracis</i>       | <i>formosa</i>          | X         |        |           |
| <i>Madracis</i>       | <i>myriaster</i>        | X         |        |           |
| <i>Madracis</i>       | <i>pharensis</i>        | X         | X      | X         |
| <i>Madracis</i>       | <i>profunda</i>         |           |        | X         |
| <i>Madracis</i>       | <i>senaria</i>          | X         |        |           |
| <i>Manicina</i>       | <i>areolata</i>         | X         |        |           |
| <i>Meandrina</i>      | <i>braziliensis</i>     |           | X      |           |
| <i>Meandrina</i>      | <i>danae</i>            | X         |        |           |
| <i>Meandrina</i>      | <i>meandrites</i>       | X         |        |           |
| <i>Montastraea</i>    | <i>annularis</i>        | X         |        |           |
| <i>Montastraea</i>    | <i>faveolata</i>        | X         |        |           |
| <i>Montastraea</i>    | <i>cavernosa</i>        | X         | X      | X         |
| <i>Montastraea</i>    | <i>franksi</i>          | X         |        |           |
| <i>Mussa</i>          | <i>angulosa</i>         | X         |        |           |
| <i>Mussismilia</i>    | <i>braziliensis</i>     |           | X      |           |
| <i>Mussismilia</i>    | <i>harttii</i>          |           | X      |           |
| <i>Mussismilia</i>    | <i>hispidia</i>         |           | X      |           |
| <i>Mycetophyllia</i>  | <i>aliciae</i>          | X         |        |           |
| <i>Mycetophyllia</i>  | <i>danaana</i>          | X         |        |           |
| <i>Mycetophyllia</i>  | <i>ferox</i>            | X         |        |           |
| <i>Mycetophyllia</i>  | <i>lamarckiana</i>      | X         |        |           |
| <i>Mycetophyllia</i>  | <i>reesi</i>            | X         |        |           |
| <i>Oculina</i>        | <i>arbuscula</i>        | X         |        |           |
| <i>Oculina</i>        | <i>diffusa</i>          | X         |        |           |
| <i>Oculina</i>        | <i>patagonica</i>       | X         |        |           |
| <i>Oculina</i>        | <i>robusta</i>          | X         |        |           |
| <i>Oculina</i>        | <i>tenella</i>          | X         |        |           |
| <i>Oculina</i>        | <i>valenciennesi</i>    | X         |        |           |

| <b>Species</b>        |                   | <b>Caribbean</b> | <b>Brazil</b> | <b>W. Africa</b> |
|-----------------------|-------------------|------------------|---------------|------------------|
| <i>Oculina</i>        | <i>varicosa</i>   | X                |               |                  |
| <i>Porites</i>        | <i>astreoides</i> | X                | X             | X                |
| <i>Porites</i>        | <i>bernardi</i>   |                  |               | X                |
| <i>Porites</i>        | <i>branneri</i>   | X                | X             |                  |
| <i>Porites</i>        | <i>colonensis</i> | X                |               |                  |
| <i>Porites</i>        | <i>divaricata</i> | X                |               |                  |
| <i>Porites</i>        | <i>furcata</i>    | X                |               |                  |
| <i>Porites</i>        | <i>hentscheli</i> |                  |               | X                |
| <i>Porites</i>        | <i>porites</i>    | X                |               | X                |
| <i>Schizoculina</i>   | <i>africana</i>   |                  |               | X                |
| <i>Schizoculina</i>   | <i>fissipara</i>  |                  |               | X                |
| <i>Scolymia</i>       | <i>cubensis</i>   | X                | X             |                  |
| <i>Scolymia</i>       | <i>lacera</i>     | X                |               |                  |
| <i>Scolymia</i>       | <i>wellsi</i>     | X                | X             |                  |
| <i>Siderastrea</i>    | <i>stellata</i>   | X                | X             | X                |
| <i>Siderastrea</i>    | <i>radians</i>    | X                | X             | X                |
| <i>Siderastrea</i>    | <i>siderea</i>    | X                | X             | X                |
| <i>Solenastrea</i>    | <i>bournoni</i>   | X                |               |                  |
| <i>Solenastrea</i>    | <i>hyades</i>     | X                |               |                  |
| <i>Stephanocoenia</i> | <i>intersepta</i> | X                | X             |                  |
| <i>Tubastraea</i>     | <i>coccinea</i>   | X                | X             | X                |
| <i>Tubastraea</i>     | <i>tagusensis</i> |                  | X             | X                |
| <b>TOTAL</b>          | <b>81</b>         | <b>69</b>        | <b>23</b>     | <b>18</b>        |
