# Supplementary material for: Long Distance Dispersal and Connectivity in Amphi-Atlantic Corals at Regional and Basin Scales
Source: PubMed Central journal article supplement (PMC3142122; doi:10.1371/journal.pone.0022298), 2011-07-22
Supplement: pone.0022298.s002.pdf [file pone.0022298.s002.pdf]

**Table S2.** Haplotype count for each species, locus and population***Favia gravida* and *Favia fragum*, Pax-C**

| Haplotype | BR1      | BR2         | CA1    | WA1      |
|-----------|----------|-------------|--------|----------|
|           | Abrolhos | João Pessoa | Panamá | São Tomé |
| FFP1      | 16       | 12          | 0      | 0        |
| FFP2      | 10       | 34          | 0      | 40       |
| FFP3      | 0        | 0           | 4      | 0        |
| FFP4      | 0        | 0           | 15     | 0        |
| FFP5      | 0        | 0           | 13     | 0        |
| TOTAL     | 26       | 46          | 32     | 40       |

***Favia gravida* and *Favia fragum*,  $\beta$ -tubulin**

| Haplotype | BR1      | BR2         | CA1    | WA1      |
|-----------|----------|-------------|--------|----------|
|           | Abrolhos | João Pessoa | Panamá | São Tomé |
| FFB1      | 33       | 21          | 0      | 19       |
| FFB2      | 5        | 0           | 0      | 0        |
| FFB3      | 0        | 6           | 0      | 0        |
| FFB4      | 0        | 25          | 0      | 0        |
| FFB5      | 0        | 0           | 24     | 0        |
| FFB6      | 0        | 0           | 4      | 0        |
| FFB7      | 0        | 0           | 4      | 0        |
| FFB8      | 0        | 0           | 4      | 0        |
| FFB9      | 0        | 0           | 0      | 9        |
| FFB10     | 0        | 0           | 0      | 12       |
| TOTAL     | 38       | 52          | 36     | 40       |

***Porites astreoides* -  $\beta$ -tubulin**

| Haplotype | BR2         | CA1    |
|-----------|-------------|--------|
|           | João Pessoa | Panamá |
| PAB1      | 20          | 0      |
| PAB2      | 16          | 8      |
| PAB3      | 5           | 0      |
| PAB4      | 1           | 0      |
| PAB5      | 0           | 9      |
| PAB6      | 0           | 5      |
| PAB7      | 0           | 2      |
| TOTAL     | 42          | 24     |

***Siderastrea radicans*, Pax-C**

| Haplotype | BR1      | BR2         | BR3       | CA1    | WA1      |
|-----------|----------|-------------|-----------|--------|----------|
|           | Abrolhos | João Pessoa | Fortaleza | Panamá | São Tomé |
| SRP1      | 8        | 6           | 10        | 15     | 25       |
| SRP2      | 6        | 4           | 6         | 0      | 15       |
| SRP3      | 0        | 12          | 0         | 0      | 1        |
| SRP4      | 0        | 4           | 4         | 0      | 2        |
| SRP5      | 0        | 1           | 0         | 1      | 0        |
| SRP6      | 0        | 0           | 0         | 2      | 0        |
| SRP7      | 0        | 0           | 0         | 2      | 0        |
| SRP8      | 0        | 0           | 0         | 1      | 0        |
| SRP9      | 0        | 0           | 0         | 0      | 1        |
| TOTAL     | 14       | 27          | 20        | 21     | 44       |

***Siderastrea radians,  $\beta$ -tubulin***

| Haplotype | BR1      | BR2         | BR3       | CA1    | WA1      |
|-----------|----------|-------------|-----------|--------|----------|
|           | Abrolhos | João Pessoa | Fortaleza | Panamá | São Tomé |
| SRB1      | 2        | 0           | 0         | 0      | 0        |
| SRB2      | 2        | 0           | 6         | 6      | 18       |
| SRB3      | 1        | 0           | 0         | 0      | 1        |
| SRB4      | 1        | 1           | 0         | 0      | 0        |
| SRB5      | 0        | 10          | 0         | 0      | 0        |
| SRB6      | 0        | 1           | 4         | 0      | 7        |
| SRB7      | 0        | 2           | 0         | 0      | 0        |
| SRB8      | 0        | 0           | 4         | 1      | 1        |
| SRB9      | 0        | 0           | 0         | 5      | 0        |
| SRB10     | 0        | 0           | 0         | 4      | 13       |
| SRB11     | 0        | 0           | 0         | 1      | 0        |
| SRB12     | 0        | 0           | 0         | 1      | 0        |
| SRB13     | 0        | 0           | 0         | 1      | 0        |
| SRB14     | 0        | 0           | 0         | 1      | 0        |
| TOTAL     | 6        | 14          | 14        | 20     | 40       |

***Siderastrea siderea, Pax-C***

| Haplotype | BR2         | BR3       | CA1    | WA1      |
|-----------|-------------|-----------|--------|----------|
|           | João Pessoa | Fortaleza | Panamá | São Tomé |
| SSP1      | 20          | 12        | 2      | 34       |
| SSP2      | 5           | 5         | 0      | 0        |
| SSP3      | 4           | 1         | 6      | 0        |
| SSP4      | 0           | 1         | 0      | 0        |
| SSP5      | 0           | 1         | 0      | 0        |
| SSP6      | 0           | 0         | 3      | 0        |
| SSP7      | 0           | 0         | 4      | 0        |
| SSP8      | 0           | 0         | 7      | 0        |
| SSP9      | 0           | 0         | 2      | 0        |
| SSP10     | 0           | 0         | 1      | 0        |
| SSP11     | 0           | 0         | 2      | 0        |
| SSP12     | 0           | 0         | 0      | 2        |
| TOTAL     | 29          | 20        | 27     | 36       |

***Siderastrea siderea,  $\beta$ -tubulin***

| Haplotype | BR1      | BR2         | BR3       | CA1    | WA1      |
|-----------|----------|-------------|-----------|--------|----------|
|           | Abrolhos | João Pessoa | Fortaleza | Panamá | São Tomé |
| SSB1      | 2        | 1           | 1         | 0      | 0        |
| SSB2      | 2        | 1           | 3         | 0      | 0        |
| SSB3      | 1        | 3           | 0         | 1      | 0        |
| SSB4      | 1        | 2           | 0         | 0      | 0        |
| SSB5      | 2        | 3           | 0         | 0      | 0        |
| SSB6      | 1        | 0           | 0         | 0      | 0        |
| SSB7      | 1        | 0           | 0         | 0      | 0        |
| SSB8      | 0        | 9           | 7         | 0      | 0        |
| SSB9      | 0        | 2           | 0         | 0      | 0        |
| SSB10     | 0        | 1           | 0         | 0      | 0        |
| SSB11     | 0        | 2           | 0         | 0      | 0        |
| SSB12     | 0        | 1           | 0         | 0      | 0        |

***Siderastrea siderea*,  $\beta$ -tubulin (cont.)**

| Haplotype | BR1      | BR2         | BR3       | CA1    | WA1      |
|-----------|----------|-------------|-----------|--------|----------|
|           | Abrolhos | João Pessoa | Fortaleza | Panamá | São Tomé |
| SSB13     | 0        | 1           | 0         | 0      | 0        |
| SSB14     | 0        | 1           | 0         | 0      | 0        |
| SSB15     | 0        | 1           | 0         | 0      | 0        |
| SSB16     | 0        | 1           | 0         | 0      | 0        |
| SSB17     | 0        | 1           | 0         | 0      | 0        |
| SSB18     | 0        | 1           | 0         | 0      | 0        |
| SSB19     | 0        | 4           | 1         | 0      | 0        |
| SSB20     | 0        | 1           | 0         | 0      | 0        |
| SSB21     | 0        | 2           | 0         | 0      | 0        |
| SSB22     | 0        | 0           | 3         | 0      | 0        |
| SSB23     | 0        | 0           | 2         | 0      | 0        |
| SSB24     | 0        | 0           | 1         | 0      | 0        |
| SSB25     | 0        | 0           | 6         | 0      | 0        |
| SSB26     | 0        | 0           | 0         | 1      | 0        |
| SSB27     | 0        | 0           | 0         | 1      | 0        |
| SSB28     | 0        | 0           | 0         | 1      | 0        |
| SSB29     | 0        | 0           | 0         | 1      | 0        |
| SSB30     | 0        | 0           | 0         | 1      | 0        |
| SSB31     | 0        | 0           | 0         | 1      | 0        |
| SSB32     | 0        | 0           | 0         | 1      | 0        |
| SSB33     | 0        | 0           | 0         | 1      | 0        |
| SSB34     | 0        | 0           | 0         | 1      | 0        |
| SSB35     | 0        | 0           | 0         | 1      | 0        |
| SSB36     | 0        | 0           | 0         | 3      | 35       |
| SSB37     | 0        | 0           | 0         | 2      | 0        |
| SSB38     | 0        | 0           | 0         | 1      | 0        |
| SSB39     | 0        | 0           | 0         | 1      | 0        |
| SSB40     | 0        | 0           | 0         | 1      | 0        |
| SSB41     | 0        | 0           | 0         | 1      | 0        |
| SSB42     | 0        | 0           | 0         | 1      | 0        |
| SSB43     | 0        | 0           | 0         | 1      | 0        |
| SSB44     | 0        | 0           | 0         | 1      | 0        |
| SSB45     | 0        | 0           | 0         | 1      | 0        |
| SSB46     | 0        | 0           | 0         | 1      | 0        |
| SSB47     | 0        | 0           | 0         | 1      | 0        |
| SSB48     | 0        | 0           | 0         | 1      | 0        |
| SSB49     | 0        | 0           | 0         | 1      | 0        |
| SSB50     | 0        | 0           | 0         | 4      | 0        |
| SSB51     | 0        | 0           | 0         | 1      | 0        |
| SSB52     | 0        | 0           | 0         | 1      | 0        |
| SSB53     | 0        | 0           | 0         | 1      | 0        |
| SSB54     | 0        | 0           | 0         | 1      | 0        |
| SSB55     | 0        | 0           | 0         | 1      | 0        |
| SSB56     | 0        | 0           | 0         | 1      | 0        |
| SSB57     | 0        | 0           | 0         | 0      | 1        |
| SSB58     | 0        | 0           | 0         | 0      | 2        |
| SSB59     | 0        | 0           | 0         | 0      | 1        |
| SSB60     | 0        | 0           | 0         | 0      | 1        |
| TOTAL     | 10       | 38          | 24        | 38     | 40       |
