# Supplementary material for: Long Distance Dispersal and Connectivity in Amphi-Atlantic Corals at Regional and Basin Scales
Source: PubMed Central journal article supplement (PMC3142122; doi:10.1371/journal.pone.0022298), 2011-07-22
Supplement: pone.0022298.s003.pdf [file pone.0022298.s003.pdf]

| Sample | $\beta$ -tubulin |  | Pax-C |  |
|--------|------------------|--|-------|--|
|--------|------------------|--|-------|--|

---

***Favia fragum***

---

*Bocas del Toro, Panamá*

|      |        |        |        |        |
|------|--------|--------|--------|--------|
| P016 | FFB 06 | FFB 06 |        |        |
| P039 | FFB 08 | FFB 08 | FFP 03 | FFP 03 |
| P040 | FFB 08 | FFB 08 | FFP 03 | FFP 03 |
| P041 | FFB 07 | FFB 07 | FFP 04 | FFP 04 |
| P106 | FFB 05 | FFB 05 | FFP 05 | FFP 05 |
| P107 | FFB 05 | FFB 05 | FFP 05 | FFP 04 |
| P108 | FFB 05 | FFB 05 | FFP 04 | FFP 04 |
| P109 | FFB 05 | FFB 05 | FFP 05 | FFP 05 |
| P110 | FFB 05 | FFB 05 | FFP 05 | FFP 05 |
| P111 | FFB 05 | FFB 05 |        |        |
| P112 | FFB 07 | FFB 07 | FFP 04 | FFP 04 |
| P113 | FFB 05 | FFB 05 | FFP 05 | FFP 05 |
| P114 | FFB 06 | FFB 06 | FFP 04 | FFP 04 |
| P115 | FFB 05 | FFB 05 | FFP 04 | FFP 04 |
| P116 | FFB 05 | FFB 05 | FFP 05 | FFP 05 |
| P396 | FFB 05 | FFB 05 | FFP 05 | FFP 05 |
| P457 | FFB 05 | FFB 05 | FFP 04 | FFP 04 |
| P458 | FFB 05 | FFB 05 | FFP 04 | FFP 04 |

---

***Favia gravida***

---

*Abrolhos, Brazil*

|      |        |        |        |        |
|------|--------|--------|--------|--------|
| B015 | FFB 01 | FFB 01 | FFP 01 | FFP 01 |
| B016 | FFB 01 | FFB 01 | FFP 01 | FFP 01 |
| B017 | FFB 02 | FFB 02 | FFP 01 | FFP 01 |
| B018 | FFB 01 | FFB 01 |        |        |
| B042 | FFB 01 | FFB 01 | FFP 01 | FFP 01 |
| B043 | FFB 01 | FFB 01 | FFP 01 | FFP 01 |
| B072 | FFB 01 | FFB 01 |        |        |
| B073 | FFB 01 | FFB 01 | FFP 02 | FFP 02 |
| B074 | FFB 01 | FFB 01 |        |        |
| B075 | FFB 01 | FFB 01 | FFP 02 | FFP 02 |
| B079 | FFB 01 | FFB 01 | FFP 02 | FFP 02 |
| B080 | FFB 01 | FFB 01 | FFP 01 | FFP 01 |
| B081 | FFB 01 | FFB 01 |        |        |
| B082 | FFB 01 | FFB 01 | FFP 01 | FFP 01 |
| B083 | FFB 01 | FFB 01 |        |        |
| B084 | FFB 01 | FFB 01 |        |        |
| B085 | FFB 02 | FFB 02 | FFP 02 | FFP 02 |
| B086 | FFB 01 | FFB 01 | FFP 01 | FFP 01 |
| B087 | FFB 01 | FFB 02 | FFP 02 | FFP 02 |

| Sample | <i>β-tubulin</i> |  | <i>Pax-C</i> |  |
|--------|------------------|--|--------------|--|
|--------|------------------|--|--------------|--|

*João Pessoa, Brazil*

|      |        |        |        |        |
|------|--------|--------|--------|--------|
| B150 | FFB 03 | FFB 03 | FFP 02 | FFP 02 |
| B162 | FFB 04 | FFB 04 | FFP 02 | FFP 02 |
| B164 | FFB 04 | FFB 04 | FFP 02 | FFP 02 |
| B170 | FFB 04 | FFB 04 | FFP 02 | FFP 02 |
| B178 | FFB 04 | FFB 04 | FFP 02 | FFP 02 |
| B209 | FFB 01 | FFB 01 | FFP 01 | FFP 01 |
| B210 | FFB 01 | FFB 01 | FFP 01 | FFP 01 |
| B211 | FFB 01 | FFB 01 | FFP 01 | FFP 01 |
| B242 | FFB 03 | FFB 03 |        |        |
| B253 | FFB 01 | FFB 01 | FFP 02 | FFP 02 |
| B254 | FFB 01 | FFB 01 | FFP 02 | FFP 02 |
| B255 | FFB 04 | FFB 01 | FFP 01 | FFP 01 |
| B256 | FFB 03 | FFB 03 | FFP 02 | FFP 02 |
| B257 | FFB 04 | FFB 04 | FFP 02 | FFP 02 |
| B258 | FFB 01 | FFB 01 | FFP 02 | FFP 02 |
| B259 | FFB 01 | FFB 01 | FFP 02 | FFP 02 |
| B261 | FFB 01 | FFB 01 | FFP 01 | FFP 01 |
| B262 | FFB 04 | FFB 04 | FFP 02 | FFP 02 |
| B263 | FFB 04 | FFB 04 | FFP 02 | FFP 02 |
| B264 | FFB 01 | FFB 01 | FFP 01 | FFP 01 |
| B265 | FFB 01 | FFB 01 |        |        |
| B266 | FFB 04 | FFB 04 |        |        |
| B300 | FFB 04 | FFB 04 | FFP 02 | FFP 02 |
| B309 | FFB 04 | FFB 04 | FFP 02 | FFP 02 |
| B313 | FFB 04 | FFB 04 | FFP 02 | FFP 02 |
| B315 | FFB 04 | FFB 04 | FFP 02 | FFP 02 |

*São Tomé, West Africa*

|       |        |        |        |        |
|-------|--------|--------|--------|--------|
| ST014 | FFB 09 | FFB 09 | FFP 02 | FFP 02 |
| ST015 | FFB 09 | FFB 09 | FFP 02 | FFP 02 |
| ST016 | FFB 01 | FFB 01 | FFP 02 | FFP 02 |
| ST017 | FFB 01 | FFB 01 | FFP 02 | FFP 02 |
| ST018 | FFB 09 | FFB 09 | FFP 02 | FFP 02 |
| ST019 | FFB 01 | FFB 01 | FFP 02 | FFP 02 |
| ST122 | FFB 10 | FFB 10 | FFP 02 | FFP 02 |
| ST123 | FFB 10 | FFB 10 | FFP 02 | FFP 02 |
| ST124 | FFB 10 | FFB 10 | FFP 02 | FFP 02 |
| ST125 | FFB 10 | FFB 10 | FFP 02 | FFP 02 |
| ST126 | FFB 10 | FFB 10 | FFP 02 | FFP 02 |
| ST127 | FFB 10 | FFB 10 | FFP 02 | FFP 02 |
| ST370 | FFB 01 | FFB 01 | FFP 02 | FFP 02 |
| ST371 | FFB 01 | FFB 01 | FFP 02 | FFP 02 |
| ST372 | FFB 09 | FFB 09 | FFP 02 | FFP 02 |

| Sample                               | <i>β-tubulin</i> |        | <i>Pax-C</i> |        |
|--------------------------------------|------------------|--------|--------------|--------|
| <i>São Tomé, West Africa (cont.)</i> |                  |        |              |        |
| ST373                                | FFB 09           | FFB 01 | FFP 02       | FFP 02 |
| ST374                                | FFB 01           | FFB 01 | FFP 02       | FFP 02 |
| ST375                                | FFB 01           | FFB 01 | FFP 02       | FFP 02 |
| ST376                                | FFB 01           | FFB 01 | FFP 02       | FFP 02 |
| ST377                                | FFB 01           | FFB 01 | FFP 02       | FFP 02 |

### ***Porites astreoides***

#### *João Pessoa, Brazil*

|      |        |        |
|------|--------|--------|
| B140 | PAB 01 | PAB 02 |
| B142 | PAB 01 | PAB 02 |
| B143 | PAB 01 | PAB 03 |
| B148 | PAB 04 | PAB 02 |
| B223 | PAB 01 | PAB 03 |
| B224 | PAB 01 | PAB 02 |
| B225 | PAB 01 | PAB 03 |
| B226 | PAB 01 | PAB 02 |
| B231 | PAB 01 | PAB 02 |
| B232 | PAB 01 | PAB 02 |
| B271 | PAB 01 | PAB 03 |
| B272 | PAB 01 | PAB 02 |
| B273 | PAB 01 | PAB 02 |
| B274 | PAB 01 | PAB 02 |
| B275 | PAB 01 | PAB 02 |
| B280 | PAB 01 | PAB 02 |
| B285 | PAB 01 | PAB 02 |
| B295 | PAB 01 | PAB 03 |
| B296 | PAB 01 | PAB 02 |
| B297 | PAB 01 | PAB 02 |
| B298 | PAB 01 | PAB 02 |

#### *Bocas del Toro, Panamá*

|      |        |        |
|------|--------|--------|
| P004 | PAB 05 | PAB 02 |
| P018 | PAB 02 | PAB 06 |
| P058 | PAB 05 | PAB 02 |
| P059 | PAB 02 | PAB 06 |
| P136 | PAB 05 | PAB 06 |
| P137 | PAB 05 | PAB 07 |
| P138 | PAB 05 | PAB 07 |
| P139 | PAB 02 | PAB 06 |
| P140 | PAB 05 | PAB 02 |
| P141 | PAB 05 | PAB 02 |
| P142 | PAB 05 | PAB 05 |
| P143 | PAB 02 | PAB 06 |

| Sample | $\beta$ -tubulin |  | Pax-C |  |
|--------|------------------|--|-------|--|
|--------|------------------|--|-------|--|

***Siderastrea radians***

*Abrolhos, Brazil*

|      |        |        |        |        |
|------|--------|--------|--------|--------|
| B092 | SB 201 | SB 202 | SP 201 | SP 201 |
| B093 | SB 201 | SB 202 | SP 201 | SP 201 |

*João Pessoa, Brazil*

|      |        |        |        |        |
|------|--------|--------|--------|--------|
| B133 |        |        | SP 203 | SP 203 |
| B134 |        |        | SP 203 | SP 203 |
| B146 | SB 205 | SB 205 | SP 202 | SP 202 |
| B194 | SB 205 | SB 205 | SP 201 | SP 202 |
| B283 | SB 205 | SB 205 | SP 201 | SP 201 |

*Fortaleza, Brazil*

|      |        |        |        |        |
|------|--------|--------|--------|--------|
| B358 | SB 202 | SB 208 | SP 201 | SP 204 |
| B360 | SB 202 | SB 208 | SP 201 | SP 204 |
| B361 | SB 202 | SB 208 | SP 201 | SP 204 |
| B367 | SB 202 | SB 208 | SP 201 | SP 204 |

*Bocas del Toro, Panamá*

|      |        |        |        |        |
|------|--------|--------|--------|--------|
| P042 | SB 202 | SB 209 | SP 206 | SP 207 |
| P043 | SB 202 | SB 209 | SP 206 | SP 207 |
| P195 | SB 210 | SB 209 | SP 201 | SP 201 |
| P196 | SB 210 | SB 211 | SP 201 | SP 201 |
| P197 | SB 202 | SB 202 | SP 201 | SP 201 |
| P198 | SB 212 | SB 213 | SP 201 | SP 201 |
| P199 | SB 210 | SB 209 | SP 201 | SP 201 |
| P200 | SB 208 | SB 214 | SP 201 | SP 208 |
| P201 | SB 202 | SB 202 | SP 201 | SP 201 |
| P202 | SB 210 | SB 209 | SP 201 | SP 201 |

*São Tomé, West Africa*

|       |        |        |        |        |
|-------|--------|--------|--------|--------|
| ST010 | SB 210 | SB 202 | SP 201 | SP 202 |
| ST024 | SB 210 | SB 202 | SP 201 | SP 204 |
| ST034 | SB 210 | SB 202 | SP 201 | SP 202 |
| ST075 | SB 210 | SB 202 | SP 201 | SP 202 |
| ST076 | SB 210 | SB 202 | SP 201 | SP 202 |
| ST077 | SB 210 | SB 202 | SP 201 | SP 202 |
| ST078 | SB 210 | SB 202 | SP 201 | SP 202 |
| ST133 | SB 210 | SB 202 | SP 202 | SP 202 |
| ST223 | SB 202 | SB 206 | SP 201 | SP 202 |
| ST224 | SB 210 | SB 202 | SP 201 | SP 202 |
| ST225 | SB 210 | SB 202 | SP 201 | SP 202 |
| ST226 | SB 202 | SB 206 | SP 201 | SP 202 |

| Sample                               | $\beta$ -tubulin |        | Pax-C  |        |
|--------------------------------------|------------------|--------|--------|--------|
| <i>São Tomé, West Africa (cont.)</i> |                  |        |        |        |
| ST311                                | SB 203           | SB 202 | SP 201 | SP 201 |
| ST335                                | SB 210           | SB 206 | SP 201 | SP 209 |
| ST351                                | SB 202           | SB 206 | SP 201 | SP 202 |
| ST354                                | SB 210           | SB 206 | SP 201 | SP 202 |
| ST355                                | SB 202           | SB 208 | SP 201 | SP 204 |
| ST362                                | SB 210           | SB 202 | SP 201 | SP 202 |

### ***Siderastrea siderea***

#### *Abrolhos, Brazil*

|      |        |        |  |  |
|------|--------|--------|--|--|
| B096 | SB 103 | SB 104 |  |  |
|------|--------|--------|--|--|

#### *João Pessoa, Brazil*

|      |        |        |        |        |
|------|--------|--------|--------|--------|
| B131 | SB 105 | SB 102 | SP 101 | SP 102 |
| B135 | SB 108 | SB 109 | SP 101 | SP 101 |
| B141 | SB 111 | SB 111 | SP 101 | SP 101 |
| B149 | SB 101 | SB 114 | SP 103 | SP 103 |
| B161 | SB 103 | SB 117 | SP 103 | SP 101 |
| B185 | SB 105 | SB 105 | SP 101 | SP 101 |
| B186 | SB 118 | SB 103 | SP 103 | SP 101 |
| B192 | SB 119 | SB 119 | SP 101 | SP 102 |
| B199 | SB 104 | SB 104 | SP 101 | SP 101 |
| B240 | SB 120 | SB 108 | SP 101 | SP 102 |
| B241 | SB 108 | SB 108 | SP 101 | SP 101 |
| B245 | SB 108 | SB 108 | SP 101 | SP 102 |
| B252 | SB 108 | SB 103 | SP 101 | SP 101 |
| B277 | SB 119 | SB 119 | SP 101 | SP 102 |

#### *Fortaleza, Brazil*

|      |        |        |        |        |
|------|--------|--------|--------|--------|
| B325 | SB 108 | SB 108 | SP 101 | SP 102 |
| B326 | SB 108 | SB 102 | SP 101 | SP 101 |
| B327 | SB 101 | SB 108 | SP 104 | SP 105 |
| B330 | SB 122 | SB 122 | SP 102 | SP 102 |
| B332 | SB 122 | SB 119 | SP 101 | SP 101 |
| B333 | SB 108 | SB 123 | SP 101 | SP 102 |
| B345 | SB 108 | SB 123 | SP 103 | SP 101 |
| B349 |        |        | 101    | SP 102 |
| B350 | SB 108 | SB 124 | SP 101 | SP 101 |
| B355 | SB 102 | SB 102 | SP 101 | SP 101 |

#### *Bocas del Toro, Panamá*

|      |        |        |        |        |
|------|--------|--------|--------|--------|
| P007 | SB 126 | SB 127 | SP 107 | SP 103 |
| P053 | SB 128 | SB 129 | SP 108 | SP 108 |
| P054 | SB 130 | SB 131 | SP 107 | SP 101 |

| Sample                                | <i>β-tubulin</i> |        | <i>Pax-C</i> |        |
|---------------------------------------|------------------|--------|--------------|--------|
| <i>Bocas del Toro, Panamá (cont.)</i> |                  |        |              |        |
| P055                                  | SB 132           | SB 133 | SP 106       | SP 103 |
| P088                                  | SB 134           | SB 135 | SP 106       | SP 103 |
| P089                                  | SB 103           | SB 136 | SP 103       | SP 103 |
| P090                                  | SB 137           | SB 138 | SP 109       | SP 109 |
| P091                                  | SB 139           | SB 140 | SP 107       | SP 107 |
| P093                                  | SB 136           | SB 143 | SP 108       | SP 108 |
| P094                                  | SB 144           | SB 145 | SP 103       | SP 110 |
| P095                                  | SB 146           | SB 147 | SP 108       | SP 101 |
| P219                                  | SB 148           | SB 149 |              |        |
| P220                                  | SB 150           | SB 150 |              |        |
| P222                                  | SB 151           | SB 150 |              |        |
| P223                                  | SB 150           | SB 152 | SP 111       | SP 111 |
| P224                                  | SB 137           | SB 153 |              |        |
| P502                                  | SB 154           | SB 155 | SP 108       | SP 108 |
| P504                                  | SB 156           | SB 136 |              |        |

*São Tomé, West Africa*

|       |        |        |        |        |
|-------|--------|--------|--------|--------|
| ST011 | SB 136 | SB 136 | SP 101 | SP 101 |
| ST012 | SB 136 | SB 136 | SP 101 | SP 101 |
| ST025 | SB 136 | SB 136 | SP 101 | SP 101 |
| ST031 | SB 136 | SB 136 | SP 101 | SP 101 |
| ST079 | SB 136 | SB 136 | SP 101 | SP 101 |
| ST119 | SB 136 | SB 136 | SP 101 | SP 101 |
| ST120 | SB 136 | SB 136 | SP 101 | SP 101 |
| ST121 | SB 136 | SB 136 | SP 101 | SP 101 |
| ST134 | SB 136 | SB 136 | SP 101 | SP 101 |
| ST137 | SB 136 | SB 136 | SP 101 | SP 101 |
| ST144 | SB 136 | SB 136 | SP 101 | SP 101 |
| ST145 | SB 136 | SB 136 | SP 101 | SP 101 |
| ST190 | SB 158 | SB 136 | SP 101 | SP 101 |
| ST191 | SB 136 | SB 136 | SP 101 | SP 101 |
| ST198 | SB 136 | SB 136 | SP 112 | SP 112 |
| ST292 | SB 136 | SB 136 | SP 101 | SP 101 |
| ST314 | SB 136 | SB 136 | SP 101 | SP 101 |
| ST349 | SB 136 | SB 160 | SP 101 | SP 101 |

***Siderastrea stellata (S. radians x S. siderea hybrids)***

*Abrolhos, Brazil*

|      |        |        |        |        |
|------|--------|--------|--------|--------|
| B094 | SB 101 | SB 101 | SP 202 | SP 202 |
| B095 | SB 102 | SB 203 | SP 201 | SP 201 |
| B097 | SB 105 | SB 106 | SP 202 | SP 202 |
| B098 | SB 105 | SB 102 | SP 202 | SP 202 |
| B099 | SB 107 | SB 204 | SP 201 | SP 201 |

| <b>Sample</b> | <b><i>β-tubulin</i></b> |  | <b><i>Pax-C</i></b> |  |
|---------------|-------------------------|--|---------------------|--|
|---------------|-------------------------|--|---------------------|--|

---

*João Pessoa, Brazil*

|      |        |        |        |        |
|------|--------|--------|--------|--------|
| B136 | SB 110 | SB 205 | SP 201 | SP 203 |
| B144 | SB 205 | SB 112 | SP 203 | SP 203 |
| B145 | SB 204 | SB 113 | SP 203 | SP 203 |
| B152 | SB 115 | SB 205 | SP 203 | SP 202 |
| B156 | SB 109 | SB 205 | SP 203 | SP 203 |
| B159 | SB 116 | SB 206 | SP 201 | SP 201 |
| B198 | SB 108 | SB 207 | SP 204 | SP 204 |
| B249 | SB 121 | SB 121 | SP 205 | SP 101 |
| B284 | SB 108 | SB 207 | SP 204 | SP 204 |

*Fortaleza, Brazil*

|      |        |        |        |        |
|------|--------|--------|--------|--------|
| B359 | SB 125 | SB 206 | SP 201 | SP 202 |
| B362 | SB 125 | SB 202 | SP 201 | SP 202 |
| B363 | SB 125 | SB 202 | SP 201 | SP 202 |
| B364 | SB 125 | SB 206 | SP 201 | SP 202 |
| B365 | SB 125 | SB 206 | SP 201 | SP 202 |
| B366 | SB 125 | SB 206 | SP 201 | SP 202 |

*Bocas del Toro, Panamá*

|      |        |        |        |        |
|------|--------|--------|--------|--------|
| P092 | SB 141 | SB 142 | SP 106 | SP 205 |
|------|--------|--------|--------|--------|

*São Tomé, West Africa*

|       |        |        |        |        |
|-------|--------|--------|--------|--------|
| ST132 | SB 157 | SB 202 | SP 201 | SP 203 |
| ST222 | SB 158 | SB 206 | SP 201 | SP 201 |
| ST265 | SB 136 | SB 202 | SP 201 | SP 201 |
| ST338 | SB 159 | SB 206 | SP 201 | SP 201 |
