# Supplementary material for: Long Distance Dispersal and Connectivity in Amphi-Atlantic Corals at Regional and Basin Scales
Source: PubMed Central journal article supplement (PMC3142122; doi:10.1371/journal.pone.0022298), 2011-07-22
Supplement: pone.0022298.s004.pdf [file pone.0022298.s004.pdf]

***F. gravida + F. fragum,  $\beta$ -tub***

| Haplotype | Accession Number |
|-----------|------------------|
| FFB01     | HQ850473         |
| FFB02     | HQ850474         |
| FFB03     | HQ850475         |
| FFB04     | HQ850476         |
| FFB05     | HQ850477         |
| FFB06     | HQ850478         |
| FFB07     | HQ850479         |
| FFB08     | HQ850480         |
| FFB09     | HQ850481         |
| FFB10     | HQ850482         |

***Siderastrea radians,  $\beta$ -tub***

| Haplotype | Accession Number |
|-----------|------------------|
| SB201     | HQ850495         |
| SB202     | HQ850496         |
| SB203     | HQ850497         |
| SB204     | HQ850498         |
| SB205     | HQ850499         |
| SB206     | HQ850500         |
| SB207     | HQ850501         |
| SB208     | HQ850502         |
| SB209     | HQ850503         |
| SB210     | HQ850504         |
| SB211     | HQ850505         |
| SB212     | HQ850506         |
| SB213     | HQ850507         |
| SB214     | HQ850508         |

***Porites astreoides -  $\beta$ -tub***

| Haplotype | Accession Number |
|-----------|------------------|
| PAB01     | HQ850457         |
| PAB02     | HQ850458         |
| PAB03     | HQ850459         |
| PAB04     | HQ850460         |
| PAB05     | HQ850461         |
| PAB06     | HQ850462         |
| PAB07     | HQ850463         |

***F. gravida + F. fragum, Pax-C***

| Haplotype | Accession Number |
|-----------|------------------|
| FFP01     | HQ850452         |
| FFP02     | HQ850453         |
| FFP03     | HQ850454         |
| FFP04     | HQ850455         |
| FFP05     | HQ850456         |

***Siderastrea radians, Pax-C***

| Haplotype | Accession Number |
|-----------|------------------|
| SP201     | HQ850464         |
| SP202     | HQ850465         |
| SP203     | HQ850466         |
| SP204     | HQ850467         |
| SP205     | HQ850468         |
| SP206     | HQ850469         |
| SP207     | HQ850470         |
| SP208     | HQ850471         |
| SP209     | HQ850472         |

***Siderastrea siderea, Pax-C***

| Haplotype | Accession Number |
|-----------|------------------|
| SP101     | HQ850483         |
| SP102     | HQ850484         |
| SP103     | HQ850485         |
| SP104     | HQ850486         |
| SP105     | HQ850487         |
| SP106     | HQ850488         |
| SP107     | HQ850489         |
| SP108     | HQ850490         |
| SP109     | HQ850491         |
| SP110     | HQ850492         |
| SP111     | HQ850493         |
| SP112     | HQ850494         |

***Siderastrea siderea*,  $\beta$ -tub**

| Haplotype | Accession Number |
|-----------|------------------|
| SB101     | HQ850509         |
| SB102     | HQ850510         |
| SB103     | HQ850511         |
| SB104     | HQ850512         |
| SB105     | HQ850513         |
| SB106     | HQ850514         |
| SB107     | HQ850515         |
| SB108     | HQ850516         |
| SB109     | HQ850517         |
| SB110     | HQ850518         |
| SB111     | HQ850519         |
| SB112     | HQ850520         |
| SB113     | HQ850521         |
| SB114     | HQ850522         |
| SB115     | HQ850523         |
| SB116     | HQ850524         |
| SB117     | HQ850525         |
| SB118     | HQ850526         |
| SB119     | HQ850527         |
| SB120     | HQ850528         |
| SB121     | HQ850529         |
| SB122     | HQ850530         |
| SB123     | HQ850531         |
| SB124     | HQ850532         |
| SB125     | HQ850533         |
| SB126     | HQ850534         |
| SB127     | HQ850535         |
| SB128     | HQ850536         |
| SB129     | HQ850537         |
| SB130     | HQ850538         |
| SB131     | HQ850539         |
| SB132     | HQ850540         |
| SB133     | HQ850541         |
| SB134     | HQ850542         |
| SB135     | HQ850543         |
| SB136     | HQ850544         |
| SB137     | HQ850545         |
| SB138     | HQ850546         |
| SB139     | HQ850547         |
| SB140     | HQ850548         |
| SB141     | HQ850549         |
| SB142     | HQ850550         |
| SB143     | HQ850551         |
| SB144     | HQ850552         |
| SB145     | HQ850553         |
| SB146     | HQ850554         |
| SB147     | HQ850555         |
| SB148     | HQ850556         |
| SB149     | HQ850557         |
| SB150     | HQ850558         |

***Siderastrea siderea*,  $\beta$ -tub (cont.)**

| Haplotype | Accession Number |
|-----------|------------------|
| SB151     | HQ850559         |
| SB152     | HQ850560         |
| SB153     | HQ850561         |
| SB154     | HQ850562         |
| SB155     | HQ850563         |
| SB156     | HQ850564         |
| SB157     | HQ850565         |
| SB158     | HQ850566         |
| SB159     | HQ850567         |
| SB160     | HQ850568         |
